# Supplementary material for: Production, Characterization, and Epitope Mapping of Monoclonal Antibodies Against Different Subtypes of Rabbit Hemorrhagic Disease Virus (RHDV)
Source: PubMed Central journal article supplement (PMC4754648; doi:10.1038/srep20857), 2016-02-16

1 **Supplementary Information**

2 *Scientific Reports office*

3 **Production, Characterization, and Epitope Mapping of Monoclonal Antibodies**  
4 **Against Different Subtypes of Rabbit Hemorrhagic Disease Virus (RHDV)**

5 Desheng Kong \* , Jiasen Liu \* #, Qian Jiang, Zuo Yu, Xiaoliang Hu, Dongchun Guo,  
6 Qianqian Huang, Meihui Jiao, Liandong Qu#

7 Zoonosis of Natural Foci, State Key Laboratory of Veterinary Biotechnology, Harbin Vet Res  
8 Institute of Chinese Academy of Agricultural Sciences, Harbin 150001, PR China

9 \* Both authors contributed equally to this work

10 #Corresponding author: Jiasen Liu and Liandong Qu

11 Tel: +86 189 4606 6100; fax: +86 0451 51997176

12 E-mail address: [neauljs@163.com](mailto:neauljs@163.com)

13 Desheng Kong < guwangdaben@163.com >

14 Qian Jiang < jiangqian623@sina.com.cn >

15 Zuo Yu < yuzuosy@163.com >

16 Xiaoliang Hu < liang679@163.com >

17 Dongchun Guo < gdongchun@126.com >

18 Qianqian Huang < huangqq0521@126.com >

19 Meihui Jiao < 15866022863@163.com >

20 Liandong Qu < qld@hvri.ac.cn >

21 Address: Harbin Vet Res Institute, Chinese Academy of Agricultural Sciences, 427 Maduan Street,  
22 Nangang District, Harbin 150001, PR China

23

24

25 **Supplementary Figure Legends**

26

27 **Fig. S1** Western blot detection of recombinant His-tagged VP60 of RHDV1 (pVP60-1) and RHDV2 (pVP60-2) with rabbit

1 hyperimmune serum. M: PageRuler Prestained Protein Ladder (Thermo Scientific, USA).

2

3 **Fig. S2** IFA detection of recombinant VP60 by eukaryotic expression. 48h after infection or transfection, green fluorescence

4 were both detected in the Sf9 and HeLa cells. Demonstration of VP60 expressing cells in IFA with rabbit hyperimmune serum in

5 Sf9 expressed sVP60-1 (A) and sVP60-1 (B) or HeLa expressed eVP60-1 (D) and eVP60-1 (E). Sf9 infected wild type

6 baculovirus (C) and HeLa transfected with pcDNA3.1(+) (F) were used as negative controls.

7

8

9 **Fig. S1**

10

11

12

13

14

15

16

17

18

19

20

21 **Fig. S2**

22

23

24

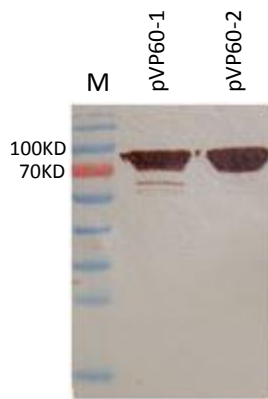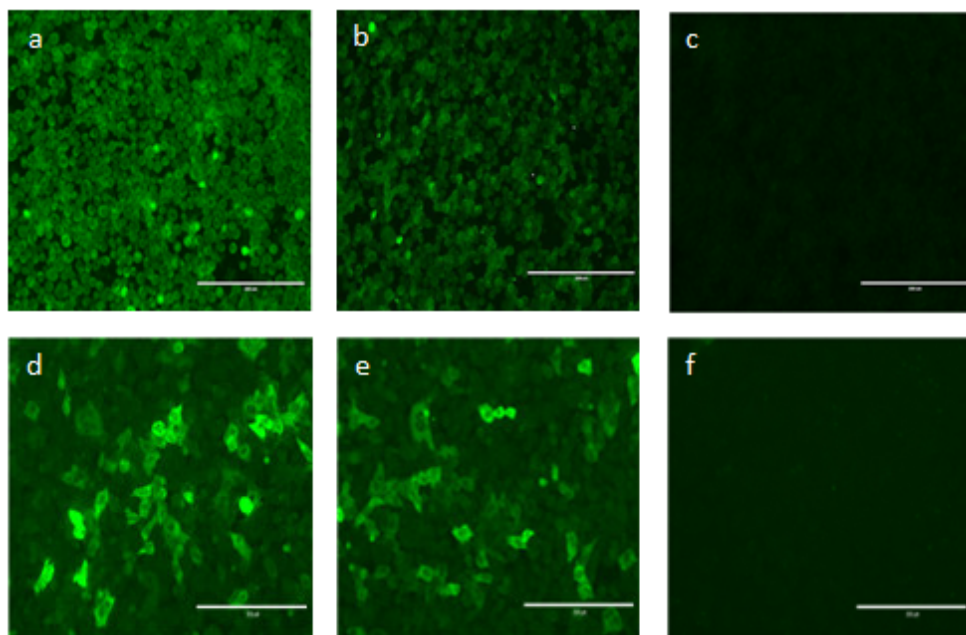

Supplement: srep20857-s1.pdf [file srep20857-s1.pdf]
